# Supplementary material for: The APC/C E3 ligase subunit ANAPC11 mediates FOXO3 protein degradation to promote cell proliferation and lymph node metastasis in urothelial bladder cancer
Source: PubMed Central journal article supplement (PMC10423259; doi:10.1038/s41419-023-06000-x), 2023-08-12

Fig. 1B

ANAPC11

GAPDH

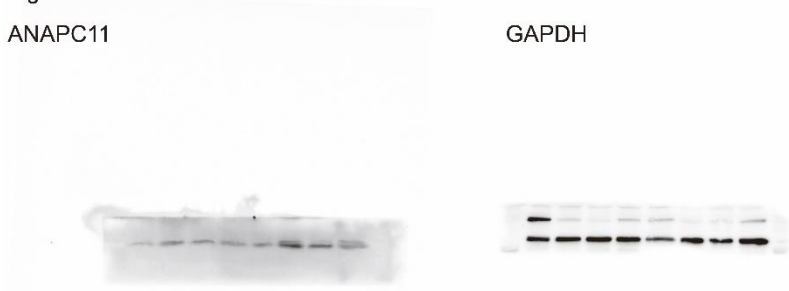

Fig. 1C

ANAPC11

GAPDH

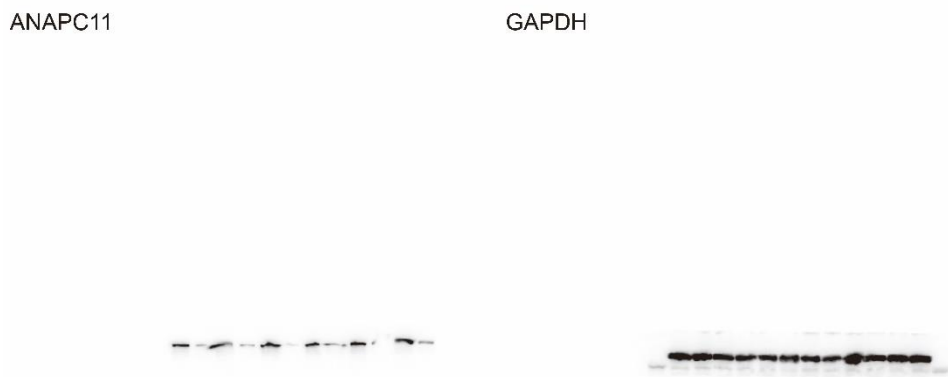

Supplementary Fig. 1A

ANAPC11

GAPDH

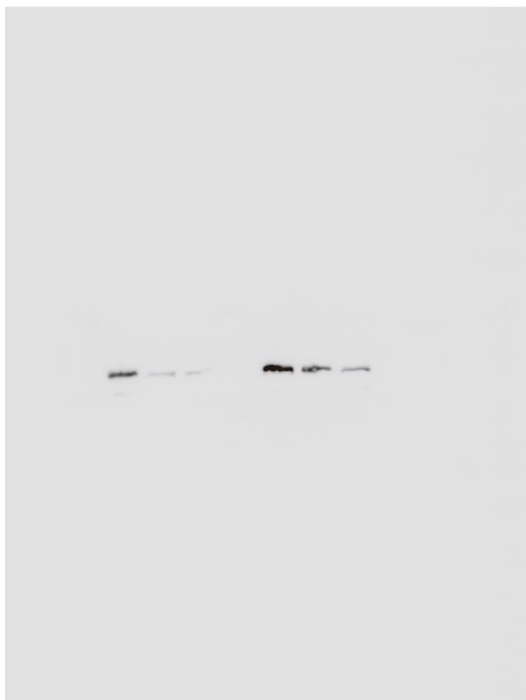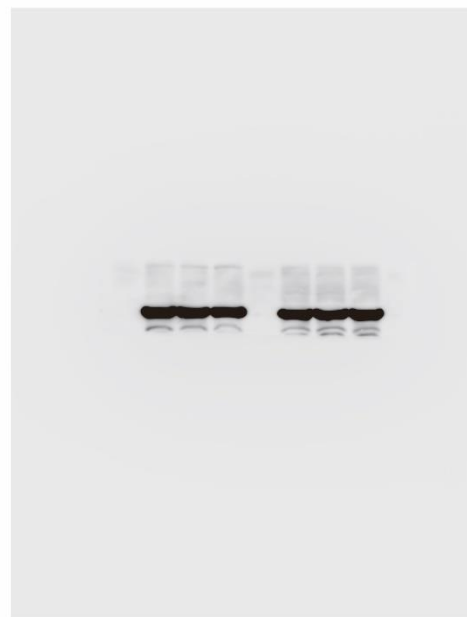

Fig. 2D

ANAPC11

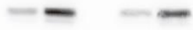

GAPDH

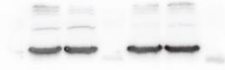

Fig. 7A

ANAPC11

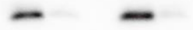

GAPDH

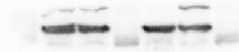

Fig. 3A

FOXO3

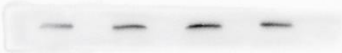

ANAPC11

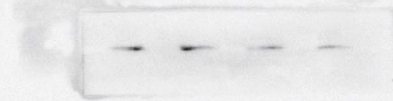

Fig. 3B

IP-His

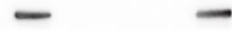

IP-ANAPC11

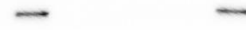

input-His

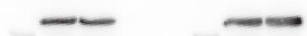

input-GAPDH

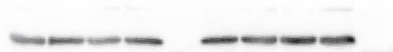

Fig. 3C

ANAPC11

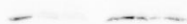

FOXO3

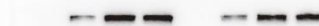

GAPDH

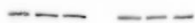

Fig. 3D

FOXO3

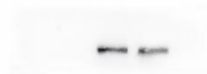

GST

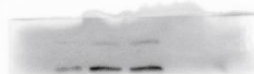

Fig. 3E

T24 FOXO3

T24 GAPDH

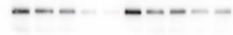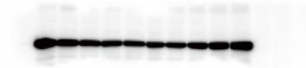

UM-UC-3 FOXO3

UM-UC-3 GAPDH

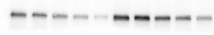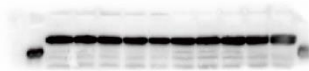

Fig. 3F

ANAPC11

FOXO3

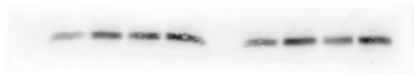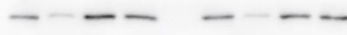

GAPDH

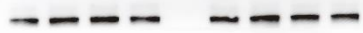

Fig. 3G

IP: FOXO3  
Ub T24

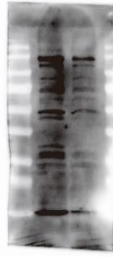

IP: FOXO3  
Ub UM-UC-3

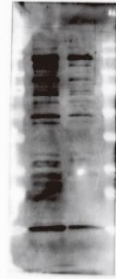

IP: FOXO3  
FOXO3

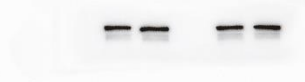

input ANAPC11  
T24

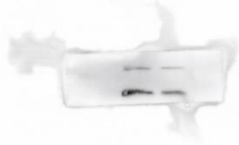

input ANAPC11  
UM-UC-3

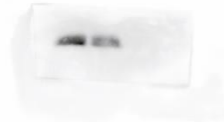

input GAPDH  
T24

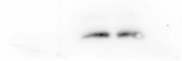

input GAPDH  
UM-UC-3

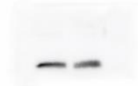

Fig. 4A  
FOXO3

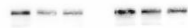

GAPDH

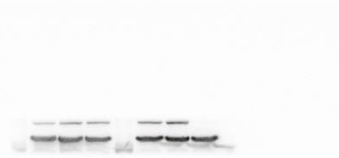

Fig. 6K

FOXO3

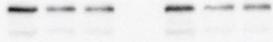

p21

same band with different exposure time

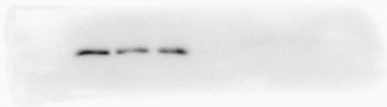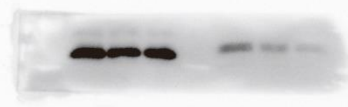

GULP1

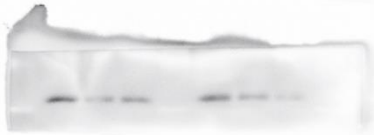

GAPDH

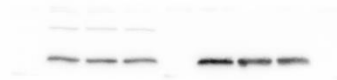

Fig. 6L

FOXO3

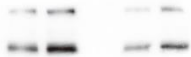

p21

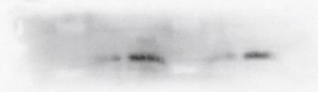

GULP1

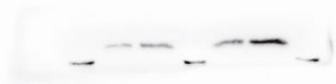

GAPDH

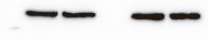

Supplementary Fig. 2B

ANAPC11

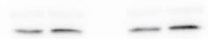

FOXO3

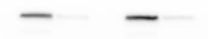

GAPDH

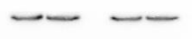

Supplementary Fig. 2D

ANAPC11

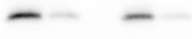

GAPDH

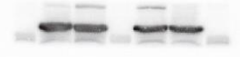

Supplementary Fig. 2E-F

IP:HA

T24

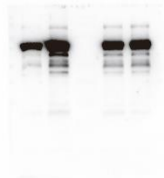

UM-UC-3

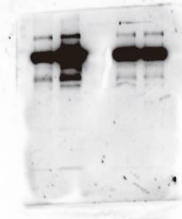

IP:FOXO3

T24

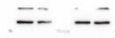

UM-UC-3

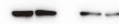

input:ANAPC11

T24

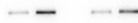

UM-UC-3

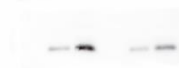



input:GAPDH

T24

UM-UC-3

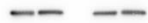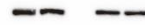

Supplement: 41419_2023_6000_MOESM8_ESM.pdf [file 41419_2023_6000_MOESM8_ESM.pdf]
